# Supplementary material
Source: publisher figshare collection journal article supplement (https://diabetesjournals.figshare.com/articles/dataset/_/20289009)
Supplement: Supplementary file 2 [file 1]

## Supplementary appendix

### Table of contents

|                                                                                                                                     |    |
|-------------------------------------------------------------------------------------------------------------------------------------|----|
| Supplementary Table 1—SGLT2i use at different time points during the FIDELIO-DKD and FIGARO-DKD studies.....                        | 2  |
| Supplementary Table 2 —Time from SGLT2i initiation to randomization during the FIDELIO-DKD and FIGARO-DKD studies .....             | 3  |
| Supplementary Table 3—Baseline characteristics in patients receiving/not receiving SGLT2is at baseline.....                         | 4  |
| Supplementary Table 4—Use of potassium-lowering agents at different time points during the FIDELIO-DKD and FIGARO-DKD studies ..... | 10 |
| Supplementary Figure 1—Percentage of time under co-medication with an SGLT2i during the studies.....                                | 18 |
| Supplementary Figure 2—Chronic eGFR slope over time in patients receiving/not receiving an SGLT2i at baseline .....                 | 19 |
| Supplementary Figure 3—Systolic blood pressure over time in patients A) receiving, and B) not receiving an SGLT2i at baseline ..... | 20 |

**Supplementary Table 1—SGLT2i use at different time points during the FIDELIO-DKD and FIGARO-DKD studies**

|                                                            | <b>Finerenone<br/>(<i>n</i> = 6,519)</b> | <b>Placebo<br/>(<i>n</i> = 6,507)</b> | <b>Total<br/>(<i>N</i> = 13,026)</b> |
|------------------------------------------------------------|------------------------------------------|---------------------------------------|--------------------------------------|
| Received SGLT2i at any time during the on-treatment period | 958 (14.7)                               | 1,032 (15.9)                          | 1,990 (15.3)                         |
| SGLT2i use at baseline                                     | 438 (6.7)                                | 439 (6.7)                             | 877 (6.7)                            |
| Initiation of SGLT2i use during the on-treatment period    | 520 (8.0)                                | 593 (9.1)                             | 1,113 (8.5)                          |
| No SGLT2i use at any time during the on-treatment period   | 5,561 (85.3)                             | 5,475 (84.1)                          | 11,036<br>(84.7)                     |

Data are *n* (%). The on-treatment period was defined as from randomization up until the on-treatment period censoring date. SGLT2i, sodium–glucose cotransporter 2 inhibitor.

**Supplementary Table 2 —Time from SGLT2i initiation to randomization during the FIDELIO-DKD and FIGARO-DKD studies**

| Time from SGLT2i start to randomization,<br>n (%) | <b>Finerenone<br/>(<i>n</i> = 438)</b> | <b>Placebo<br/>(<i>n</i> = 439)</b> | <b>Total<br/>(<i>N</i> = 877)</b> |
|---------------------------------------------------|----------------------------------------|-------------------------------------|-----------------------------------|
| ≤1 month                                          | 38 (8.7)                               | 34 (7.7)                            | 72 (8.2)                          |
| >1 month to ≤2 months                             | 40 (9.1)                               | 34 (7.7)                            | 74 (8.4)                          |
| >2 months to ≤3 months                            | 28 (6.4)                               | 44 (10.0)                           | 72 (8.2)                          |
| >3 months to ≤4 months                            | 36 (8.2)                               | 32 (7.3)                            | 68 (7.8)                          |
| >4 months to ≤5 months                            | 22 (5.0)                               | 26 (5.9)                            | 48 (5.5)                          |
| >5 months to ≤6 months                            | 20 (4.6)                               | 17 (3.9)                            | 37 (4.2)                          |
| >6 months                                         | 254 (58.0)                             | 252 (57.4)                          | 506 (57.7)                        |

SGLT2i, sodium–glucose cotransporter 2 inhibitor.

**Supplementary Table 3—Baseline characteristics in patients receiving/not receiving SGLT2is at baseline**

|                | SGLT2i at baseline              |                              | No SGLT2i at baseline             |                                |
|----------------|---------------------------------|------------------------------|-----------------------------------|--------------------------------|
|                | Finerenone<br>( <i>n</i> = 438) | Placebo<br>( <i>n</i> = 439) | Finerenone<br>( <i>n</i> = 6,081) | Placebo<br>( <i>n</i> = 6,068) |
| Age, years     | 61.8 ± 9.7                      | 61.7 ± 9.6                   | 64.9 ± 9.3                        | 65.0 ± 9.6                     |
| Sex            | 331 (75.6)                      | 340 (77.4)                   | 4,150 (68.2)                      | 4,267 (70.3)                   |
| Male           | 331 (75.6)                      | 340 (77.4)                   | 4,150 (68.2)                      | 4,267 (70.3)                   |
| Female         | 107 (24.4)                      | 99 (22.6)                    | 1,931 (31.8)                      | 1,801 (29.7)                   |
| World region   |                                 |                              |                                   |                                |
| North America  | 65 (14.8)                       | 83 (18.9)                    | 961 (15.8)                        | 942 (15.5)                     |
| Latin America  | 41 (9.4)                        | 28 (6.4)                     | 678 (11.1)                        | 687 (11.3)                     |
| Western Europe | 126 (28.8)                      | 118 (26.9)                   | 1,218 (20.0)                      | 1,274 (21.0)                   |

|                                  |                              |                              |                              |                              |
|----------------------------------|------------------------------|------------------------------|------------------------------|------------------------------|
| Eastern Europe                   | 51 (11.6)                    | 56 (12.8)                    | 1,541 (25.3)                 | 1,478 (24.4)                 |
| Asia                             | 133 (30.4)                   | 133 (30.3)                   | 1,467 (24.1)                 | 1,471 (24.2)                 |
| Other                            | 22 (5.0)                     | 21 (4.8)                     | 216 (3.6)                    | 216 (3.6)                    |
| Race                             |                              |                              |                              |                              |
| White                            | 325 (74.2)                   | 319 (72.2)                   | 4,124 (67.8)                 | 4,101 (67.6)                 |
| Asian                            | 92 (21.0)                    | 93 (21.2)                    | 1,340 (22.0)                 | 1,369 (22.6)                 |
| Black/African American           | 5 (1.1)                      | 15 (3.4)                     | 248 (4.1)                    | 254 (4.2)                    |
| Systolic blood pressure, mmHg    | 133.3 ± 14.8                 | 133.4 ± 14.0                 | 137.0 ± 14.1                 | 137.0 ± 14.3                 |
| Diastolic blood pressure, mmHg   | 75.5 ± 9.6                   | 76.4 ± 9.7                   | 76.4 ± 9.6                   | 76.4 ± 9.6                   |
| BMI, kg/m <sup>2</sup>           | 32.8 ± 6.3                   | 32.3 ± 5.8                   | 31.2 ± 6.0                   | 31.2 ± 6.0                   |
| Duration of diabetes, years      | 16.0 ± 8.4                   | 15.1 ± 7.7                   | 15.4 ± 8.8                   | 15.4 ± 8.7                   |
| HbA <sub>1c</sub> , % (mmol/mol) | 7.94 ± 1.22<br>(63.3 ± 13.3) | 7.98 ± 1.23<br>(63.7 ± 13.4) | 7.69 ± 1.37<br>(60.6 ± 15.0) | 7.67 ± 1.36<br>(60.3 ± 14.9) |

|                                  |               |               |                 |                 |
|----------------------------------|---------------|---------------|-----------------|-----------------|
| Serum potassium, mEq/L           | 4.28 ± 0.42   | 4.31 ± 0.41   | 4.35 ± 0.44     | 4.35 ± 0.45     |
| eGFR, mL/min/1.73 m <sup>2</sup> |               |               |                 |                 |
| Mean                             | 66.8 ± 21.2   | 65.7 ± 21.0   | 56.8 ± 21.5     | 57.1 ± 21.7     |
| Distribution                     |               |               |                 |                 |
| <25                              | 0             | 0             | 81 (1.3)        | 81 (1.3)        |
| 25–<45                           | 72 (16.4)     | 70 (15.9)     | 2,045 (33.6)    | 2,045 (33.7)    |
| 45–<60                           | 109 (24.9)    | 132 (30.1)    | 1,608 (26.4)    | 1,585 (26.1)    |
| ≥60                              | 257 (58.7)    | 237 (54.0)    | 2,346 (38.6)    | 2,355 (38.8)    |
| UACR, mg/g                       |               |               |                 |                 |
| Median                           | 445 (185–959) | 448 (185–933) | 520 (198–1,146) | 521 (200–1,180) |
| Distribution                     |               |               |                 |                 |
| <30                              | 7 (1.6)       | 9 (2.1)       | 113 (1.9)       | 101 (1.7)       |

|                                   |                  |                  |                  |                  |
|-----------------------------------|------------------|------------------|------------------|------------------|
| 30–<300                           | 141 (32.2)       | 142 (32.3)       | 1,935 (31.8)     | 1,881 (31.0)     |
| ≥300                              | 290 (66.2)       | 288 (65.6)       | 4,031 (66.3)     | 4,083 (67.3)     |
| Waist–hip ratio                   | 1.02 ± 0.09      | 1.03 ± 0.13      | 1.00 ± 0.11      | 1.00 ± 0.11      |
| Waist circumference, cm           | 111.4 ± 14.8     | 110.8 ± 14.9     | 106.6 ± 15.1     | 106.8 ± 15.1     |
| hs-C-reactive protein, mg/L       | 2.24 (1.07–4.89) | 2.21 (1.08–4.64) | 2.20 (0.94–5.19) | 2.22 (0.95–5.12) |
| Heart rate, bpm                   | 74.6 ± 11.4      | 75.3 ± 11.9      | 73.1 ± 11.4      | 72.8 ± 11.4      |
| History of cardiovascular disease | 194 (44.3)       | 211 (48.1)       | 2,785 (45.8)     | 2,745 (45.2)     |
| History of heart failure          | 25 (5.7)         | 21 (4.8)         | 460 (7.6)        | 501 (8.3)        |
| Current smoker                    | 80 (18.3)        | 82 (18.7)        | 985 (16.2)       | 946 (15.6)       |
| Medication use at baseline        |                  |                  |                  |                  |
| RAS inhibitor                     | 437 (99.8)       | 438 (99.8)       | 6,071 (99.8)     | 6,057 (99.8)     |
| Beta-blocker                      | 216 (49.3)       | 216 (49.2)       | 3,020 (49.7)     | 3,052 (50.3)     |

|                            |            |            |              |              |
|----------------------------|------------|------------|--------------|--------------|
| Diuretic                   | 224 (51.1) | 215 (49.0) | 3,101 (51.0) | 3,170 (52.2) |
| Loop                       | 72 (16.4)  | 77 (17.5)  | 1,310 (21.5) | 1,344 (22.1) |
| Thiazide                   | 127 (29.0) | 122 (27.8) | 1,482 (24.4) | 1,421 (23.4) |
| Statin                     | 363 (82.9) | 374 (85.2) | 4,294 (70.6) | 4,368 (72.0) |
| Potassium supplement       | 10 (2.3)   | 14 (3.2)   | 186 (3.1)    | 175 (2.9)    |
| Potassium-lowering agent   | 5 (1.1)    | 2 (0.5)    | 89 (1.5)     | 86 (1.4)     |
| Glucose-lowering therapies |            |            |              |              |
| Insulin and analogues      | 264 (60.3) | 251 (57.2) | 3,602 (59.2) | 3,513 (57.9) |
| Metformin                  | 352 (80.4) | 340 (77.4) | 3,460 (56.9) | 3,405 (56.1) |
| Sulfonylurea               | 120 (27.4) | 98 (22.3)  | 1,571 (25.8) | 1,600 (26.4) |
| DPP-4 inhibitor            | 137 (31.3) | 119 (27.1) | 1,523 (25.0) | 1,499 (24.7) |
| GLP-1RA                    | 86 (19.6)  | 81 (18.5)  | 411 (6.8)    | 366 (6.0)    |



|                             |          |          |           |           |
|-----------------------------|----------|----------|-----------|-----------|
| Alpha glucosidase inhibitor | 25 (5.7) | 10 (2.3) | 298 (4.9) | 323 (5.3) |
| Meglitinide                 | 16 (3.7) | 13 (3.0) | 257 (4.2) | 245 (4.0) |
| Thiazolidinedione           | 33 (7.5) | 25 (5.7) | 235 (3.9) | 224 (3.7) |

Data are mean  $\pm$  standard deviation, *n* (%), or median (interquartile range). bpm, beats per minute; DPP-4, dipeptidyl peptidase-4; eGFR, estimated glomerular filtration rate; GLP-1RA, glucagon-like peptide-1 receptor agonist; hs, high sensitivity; RAS, renin–angiotensin system; SGLT2i, sodium–glucose cotransporter 2 inhibitor; UACR, urine albumin-to-creatinine ratio.

**Supplementary Table 4—Use of potassium-lowering agents at different time points during the FIDELIO-DKD and FIGARO-DKD studies**

| n (%)                                                                        | <b>Finerenone<br/>(n = 6,519)</b> | <b>Placebo<br/>(n = 6,507)</b> | <b>Total<br/>(N = 13,026)</b> |
|------------------------------------------------------------------------------|-----------------------------------|--------------------------------|-------------------------------|
| Received potassium-lowering agent at any time during the on-treatment period | 324 (5.0)                         | 217 (3.3)                      | 541 (4.2)                     |
| Calcium polystyrene sulfonate                                                | 178 (2.7)                         | 122 (1.9)                      | 300 (2.3)                     |
| Sodium polystyrene sulfonate                                                 | 140 (2.1)                         | 96 (1.5)                       | 236 (1.8)                     |
| Sodium zirconium cyclosilicate                                               | 7 (0.1)                           | 3 (<0.1)                       | 10 (<0.1)                     |
| Patiomer or patiomer sorbitex calcium                                        | 15 (0.2)                          | 7 (0.1)                        | 22 (0.2)                      |
| Potassium-lowering agent use at baseline                                     | 94 (1.4)                          | 88 (1.4)                       | 182 (1.4)                     |
| Calcium polystyrene sulfonate                                                | 67 (1.0)                          | 53 (0.8)                       | 120 (0.9)                     |
| Sodium polystyrene sulfonate                                                 | 30 (0.5)                          | 32 (0.5)                       | 62 (0.5)                      |
| Sodium zirconium cyclosilicate                                               | 0                                 | 1 (<0.1)                       | 1 (<0.1)                      |
| Patiomer or patiomer sorbitex calcium                                        | 2 (<0.1)                          | 4 (0.1)                        | 6 (<0.1)                      |
| Initiation of potassium-lowering agent use during the on-treatment period    | 230 (3.5)                         | 129 (2.0)                      | 359 (2.8)                     |

|                                                                            |              |              |               |
|----------------------------------------------------------------------------|--------------|--------------|---------------|
| No potassium-lowering agent use at any time during the on-treatment period | 6,195 (95.0) | 6,290 (96.7) | 12,485 (95.8) |
|----------------------------------------------------------------------------|--------------|--------------|---------------|

Multiple drug groups per drug are possible, therefore the same drug may be counted in more than one category for the same patient.

**Supplementary Table 5—Baseline characteristics in patients initiating SGLT2i use during the on-treatment period**

|               | No SGLT2i at baseline; with SGLT2i initiation during the on-treatment period |                              | No SGLT2i at baseline; without SGLT2i initiation during the on-treatment period |                                |
|---------------|------------------------------------------------------------------------------|------------------------------|---------------------------------------------------------------------------------|--------------------------------|
|               | Finerenone<br>( <i>n</i> = 520)                                              | Placebo<br>( <i>n</i> = 593) | Finerenone<br>( <i>n</i> = 5,561)                                               | Placebo<br>( <i>n</i> = 5,475) |
| Age, years    | 62.6 ± 9.3                                                                   | 62.4 ± 9.6                   | 65.1 ± 9.3                                                                      | 65.3 ± 9.6                     |
| Sex           |                                                                              |                              |                                                                                 |                                |
| Male          | 392 (75.4)                                                                   | 458 (77.2)                   | 3,758 (67.6)                                                                    | 3,809 (69.6)                   |
| Female        | 128 (24.6)                                                                   | 135 (22.8)                   | 1,803 (32.4)                                                                    | 1,666 (30.4)                   |
| World region  |                                                                              |                              |                                                                                 |                                |
| North America | 50 (9.6)                                                                     | 62 (10.5)                    | 911 (16.4)                                                                      | 880 (16.1)                     |
| Latin America | 54 (10.4)                                                                    | 53 (8.9)                     | 624 (11.2)                                                                      | 634 (11.6)                     |

|                                |              |              |              |              |
|--------------------------------|--------------|--------------|--------------|--------------|
| Western Europe                 | 143 (27.5)   | 179 (30.2)   | 1,075 (19.3) | 1,095 (20.0) |
| Eastern Europe                 | 46 (8.8)     | 45 (7.6)     | 1,495 (26.9) | 1,433 (26.2) |
| Asia                           | 219 (42.1)   | 244 (41.1)   | 1,248 (22.4) | 1,227 (22.4) |
| Other                          | 8 (1.5)      | 10 (1.7)     | 208 (3.7)    | 206 (3.8)    |
| Race                           |              |              |              |              |
| White                          | 305 (58.7)   | 344 (58.0)   | 3,819 (68.7) | 3,757 (68.6) |
| Asian                          | 186 (35.8)   | 212 (35.8)   | 1,154 (20.8) | 1,157 (21.1) |
| Black/African American         | 8 (1.5)      | 10 (1.7)     | 240 (4.3)    | 244 (4.5)    |
| Systolic blood pressure, mmHg  | 137.4 ± 14.2 | 137.1 ± 14.9 | 137.0 ± 14.1 | 137.0 ± 14.2 |
| Diastolic blood pressure, mmHg | 77.3 ± 10.0  | 77.2 ± 9.8   | 76.3 ± 9.6   | 76.3 ± 9.6   |
| BMI, kg/m <sup>2</sup>         | 31.1 ± 5.8   | 31.2 ± 5.7   | 31.2 ± 6.0   | 31.2 ± 6.0   |
| Duration of diabetes, years    | 15.1 ± 8.0   | 15.1 ± 8.1   | 15.4 ± 8.8   | 15.4 ± 8.8   |

|                                  |                              |                              |                              |                              |
|----------------------------------|------------------------------|------------------------------|------------------------------|------------------------------|
| HbA <sub>1c</sub> , % (mmol/mol) | 7.99 ± 1.35<br>(63.8 ± 14.7) | 7.96 ± 1.32<br>(63.5 ± 14.4) | 7.67 ± 1.37<br>(60.3 ± 15.0) | 7.64 ± 1.36<br>(60.0 ± 14.9) |
| Serum potassium, mEq/L           | 4.27 ± 0.42                  | 4.31 ± 0.41                  | 4.36 ± 0.44                  | 4.36 ± 0.45                  |
| eGFR, mL/min/1.73 m <sup>2</sup> |                              |                              |                              |                              |
| Mean                             | 66.2 ± 20.9                  | 66.0 ± 21.1                  | 56.0 ± 21.3                  | 56.1 ± 21.5                  |
| Distribution                     |                              |                              |                              |                              |
| <25                              | 2 (0.4)                      | 1 (0.2)                      | 79 (1.4)                     | 80 (1.5)                     |
| 25–<45                           | 76 (14.6)                    | 103 (17.4)                   | 1,969 (35.4)                 | 1,942 (35.5)                 |
| 45–<60                           | 143 (27.5)                   | 149 (25.1)                   | 1,465 (26.3)                 | 1,436 (26.2)                 |
| ≥60                              | 299 (57.5)                   | 340 (57.3)                   | 2,047 (36.8)                 | 2,015 (36.8)                 |
| UACR, mg/g                       |                              |                              |                              |                              |
| Median                           | 423 (155–818)                | 481 (178–1,014)              | 531 (205–1,172)              | 526 (204–1,202)              |
| Distribution                     |                              |                              |                              |                              |

|                                   |                  |                  |                  |                  |
|-----------------------------------|------------------|------------------|------------------|------------------|
| <30                               | 7 (1.3)          | 10 (1.7)         | 106 (1.9)        | 91 (1.7)         |
| 30–<300                           | 197 (37.9)       | 205 (34.6)       | 1,738 (31.3)     | 1,676 (30.6)     |
| ≥300                              | 316 (60.8)       | 377 (63.6)       | 3,715 (66.8)     | 3,706 (67.7)     |
| Waist–hip ratio                   | 1.01 ± 0.10      | 1.01 ± 0.09      | 1.00 ± 0.11      | 1.00 ± 0.11      |
| Waist circumference, cm           | 107.4 ± 14.5     | 107.2 ± 14.3     | 106.6 ± 15.2     | 106.8 ± 15.1     |
| hs-C-reactive protein, mg/L       | 1.74 (0.73–3.91) | 1.97 (0.85–4.19) | 2.24 (0.95–5.30) | 2.25 (0.96–5.18) |
| Heart rate, bpm                   | 75.2 ± 11.6      | 74.5 ± 11.8      | 72.9 ± 11.4      | 72.6 ± 11.4      |
| History of cardiovascular disease | 213 (41.0)       | 222 (37.4)       | 2,572 (46.3)     | 2,523 (46.1)     |
| History of heart failure          | 22 (4.2)         | 30 (5.1)         | 438 (7.9)        | 471 (8.6)        |
| Current smoker                    | 111 (21.3)       | 110 (18.5)       | 874 (15.7)       | 836 (15.3)       |
| Medication use at baseline        |                  |                  |                  |                  |
| RAS inhibitor                     | 519 (99.8)       | 592 (99.8)       | 5,552 (99.8)     | 5,465 (99.8)     |

|                            |            |            |              |              |
|----------------------------|------------|------------|--------------|--------------|
| Beta-blocker               | 232 (44.6) | 272 (45.9) | 2,788 (50.1) | 2,780 (50.8) |
| Diuretic                   | 241 (46.3) | 282 (47.6) | 2,860 (51.4) | 2,888 (52.7) |
| Loop                       | 76 (14.6)  | 89 (15.0)  | 1,234 (22.2) | 1,255 (22.9) |
| Thiazide                   | 151 (29.0) | 161 (27.2) | 1,331 (23.9) | 1,260 (23.0) |
| Statin                     | 395 (76.0) | 448 (75.5) | 3,899 (70.1) | 3,920 (71.6) |
| Potassium supplement       | 9 (1.7)    | 10 (1.7)   | 177 (3.2)    | 165 (3.0)    |
| Potassium-lowering agent   | 7 (1.3)    | 6 (1.0)    | 82 (1.5)     | 80 (1.5)     |
| Glucose-lowering therapies | 510 (98.1) | 588 (99.2) | 5,406 (97.2) | 5,339 (97.5) |
| Insulin and analogues      | 282 (54.2) | 332 (56.0) | 3,320 (59.7) | 3,181 (58.1) |
| Metformin                  | 406 (78.1) | 434 (73.2) | 3,054 (54.9) | 2,971 (54.3) |
| Sulfonylurea               | 156 (30.0) | 177 (29.8) | 1,415 (25.4) | 1,423 (26.0) |
| DPP-4 inhibitor            | 205 (39.4) | 233 (39.3) | 1,318 (23.7) | 1,266 (23.1) |



|                             |           |           |           |           |
|-----------------------------|-----------|-----------|-----------|-----------|
| GLP-1RA                     | 75 (14.4) | 66 (11.1) | 336 (6.0) | 300 (5.5) |
| Alpha glucosidase inhibitor | 32 (6.2)  | 56 (9.4)  | 266 (4.8) | 267 (4.9) |
| Meglitinide                 | 25 (4.8)  | 35 (5.9)  | 232 (4.2) | 210 (3.8) |
| Thiazolidinedione           | 38 (7.3)  | 34 (5.7)  | 197 (3.5) | 190 (3.5) |

Data are mean  $\pm$  standard deviation, *n* (%), or median (interquartile range). bpm, beats per minute; DPP-4, dipeptidyl peptidase-4; eGFR, estimated glomerular filtration rate; GLP-1RA, glucagon-like peptide-1 receptor agonist; hs, high sensitivity; RAS, renin–angiotensin system; SGLT2i, sodium–glucose cotransporter 2 inhibitor; UACR, urine albumin-to-creatinine ratio.

**Supplementary Figure 1—Percentage of time under co-medication with an SGLT2i during the studies**

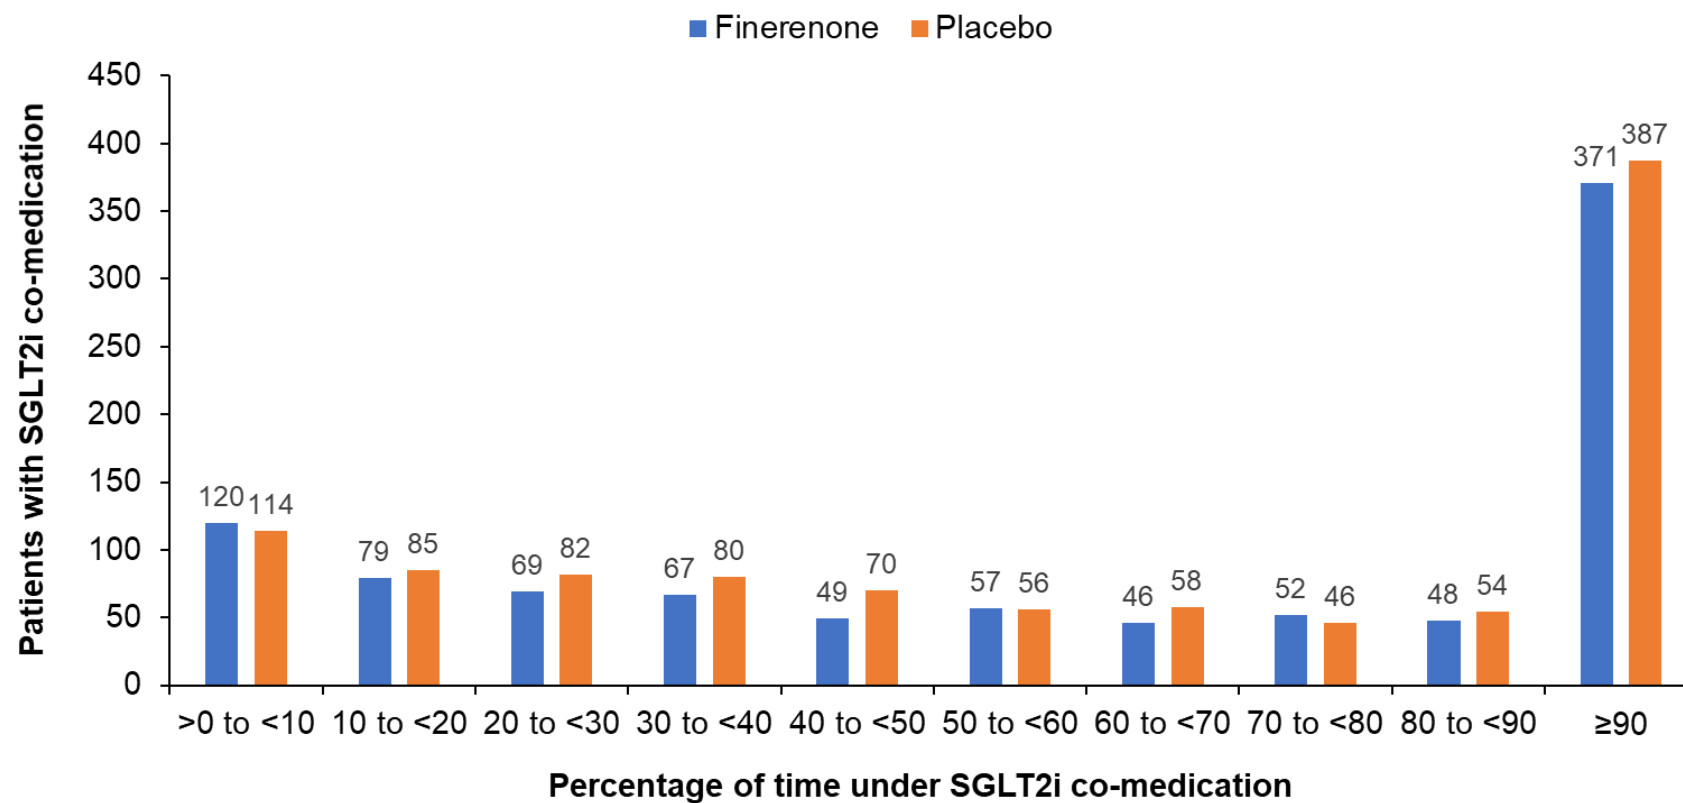

Data are co-medication use from day of randomization until on-treatment analysis censoring date. SGLT2i, sodium–glucose cotransporter 2 inhibitor.

**Supplementary Figure 2—Chronic eGFR slope over time in patients receiving/not receiving an SGLT2i at baseline**

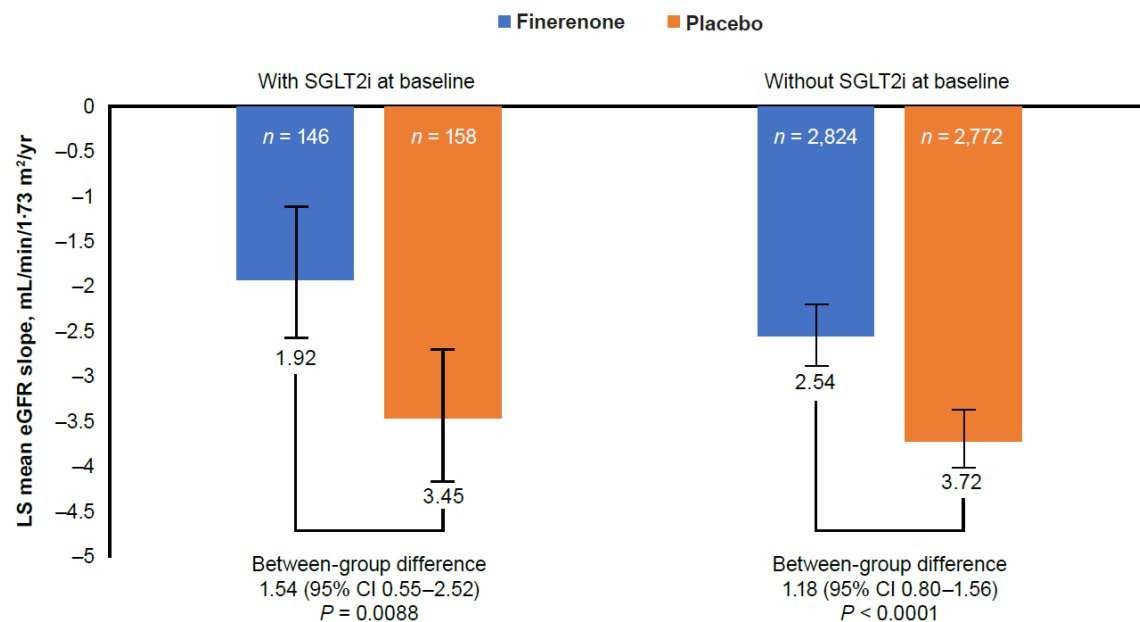

Chronic eGFR slope (and 95% CI) from month 4 to the end-of-study visit. CI, confidence interval; eGFR, estimated glomerular filtration rate; LS, least-squares; SGLT2i, sodium–glucose cotransporter 2 inhibitor.

Supplementary Figure 3—Systolic blood pressure over time in patients A) receiving, and B) not receiving an SGLT2i at baseline

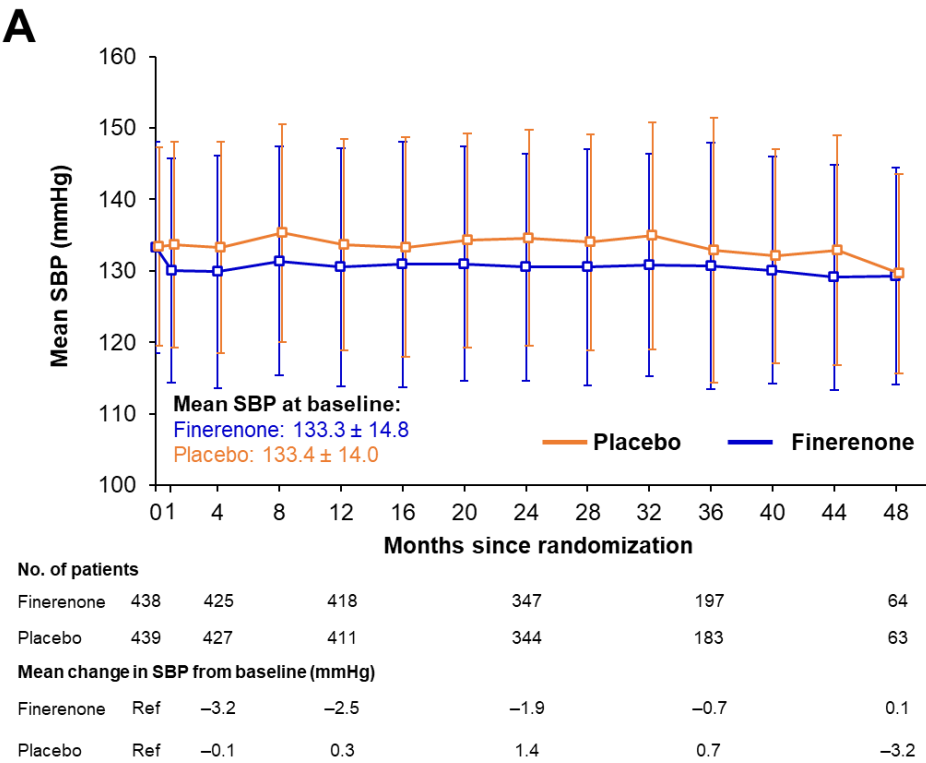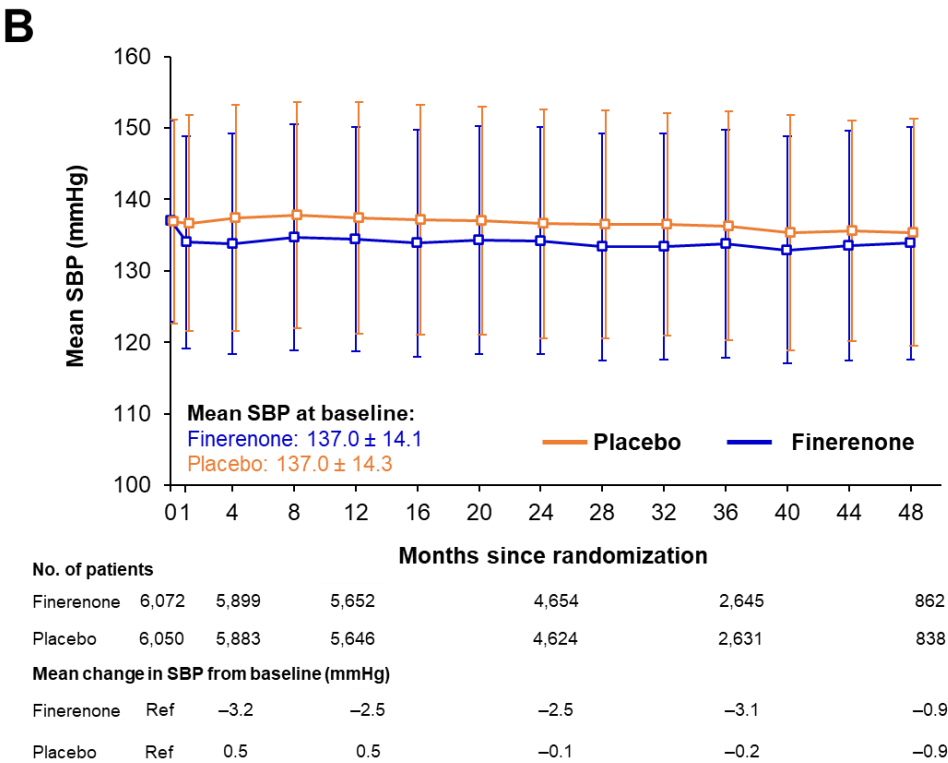

SBP, systolic blood pressure; SGLT2i, sodium–glucose cotransporter 2 inhibitor.
